# Supplementary material
Source: publisher figshare collection journal article supplement (https://acs.figshare.com/ndownloader/files/3734323)
Supplement: Supplementary file 1 [file 3734323]

 
data_shelxl 
 
#  Crystallographer: Brian C. Manor
 
_audit_creation_method            SHELXL-97 
_chemical_name_common             ? 
_chemical_melting_point           ? 
_chemical_formula_moiety          ? 
_chemical_formula_sum 
 'C46 H70 Cl0.15 N2 O P2.55 V' 
_chemical_formula_weight          802.27 
 
loop_ 
 _atom_type_symbol 
 _atom_type_description 
 _atom_type_scat_dispersion_real 
 _atom_type_scat_dispersion_imag 
 _atom_type_scat_source 
 'C'  'C'   0.0033   0.0016 
 'International Tables Vol C Tables 4.2.6.8 and 6.1.1.4' 
 'H'  'H'   0.0000   0.0000 
 'International Tables Vol C Tables 4.2.6.8 and 6.1.1.4' 
 'N'  'N'   0.0061   0.0033 
 'International Tables Vol C Tables 4.2.6.8 and 6.1.1.4' 
 'O'  'O'   0.0106   0.0060 
 'International Tables Vol C Tables 4.2.6.8 and 6.1.1.4' 
 'P'  'P'   0.1023   0.0942 
 'International Tables Vol C Tables 4.2.6.8 and 6.1.1.4' 
 'V'  'V'   0.3005   0.5294 
 'International Tables Vol C Tables 4.2.6.8 and 6.1.1.4' 
 'Cl'  'Cl'   0.1484   0.1585 
 'International Tables Vol C Tables 4.2.6.8 and 6.1.1.4' 
 
_symmetry_cell_setting                 monoclinic
_symmetry_space_group_name_H-M        'P 21/n     '
_symmetry_Int_Tables_number                14
 
loop_ 
 _symmetry_equiv_pos_as_xyz 
 'x, y, z' 
 '-x+1/2, y+1/2, -z+1/2' 
 '-x, -y, -z' 
 'x-1/2, -y-1/2, z-1/2' 
 
_cell_length_a                    13.1916(10) 
_cell_length_b                    17.3669(13) 
_cell_length_c                    19.9287(16) 
_cell_angle_alpha                 90.00 
_cell_angle_beta                  90.145(3) 
_cell_angle_gamma                 90.00 
_cell_volume                      4565.6(6) 
_cell_formula_units_Z             4 
_cell_measurement_temperature     100(2) 
_exptl_crystal_description        prism 
_exptl_crystal_size_max           0.32
_exptl_crystal_size_mid           0.25 
_exptl_crystal_size_min           0.20 
_exptl_crystal_density_diffrn     1.167 
_exptl_crystal_density_method     'not measured' 
_exptl_crystal_F_000              1727 
_exptl_absorpt_coefficient_mu     0.350 
_exptl_absorpt_correction_type    'multi-scan' 
_exptl_absorpt_process_details    '(SADABS; Sheldrick, 2007)'
_exptl_absorpt_correction_T_min   0.6540
_exptl_absorpt_correction_T_max   0.7456 
_diffrn_ambient_temperature       100(1) 
_diffrn_radiation_wavelength      0.71073 
_diffrn_radiation_type            MoK\a 
_diffrn_radiation_source          'fine-focus sealed tube' 
_diffrn_radiation_monochromator   graphite 
_diffrn_measurement_device        'CCD Area Detector'
_diffrn_measurement_device_type   'Bruker APEXII' 
_diffrn_measurement_method        'phi and omega scans'
_diffrn_reflns_number             61102 
_diffrn_reflns_av_R_equivalents   0.0460 
_diffrn_reflns_av_sigmaI/netI     0.0375 
_diffrn_reflns_limit_h_min        -17 
_diffrn_reflns_limit_h_max        17 
_diffrn_reflns_limit_k_min        -22 
_diffrn_reflns_limit_k_max        20 
_diffrn_reflns_limit_l_min        -25 
_diffrn_reflns_limit_l_max        21 
_diffrn_reflns_theta_min          1.56 
_diffrn_reflns_theta_max          27.51 
_reflns_number_total              10441 
_reflns_number_gt                 7846 
_reflns_threshold_expression      >2sigma(I) 
 
_computing_data_collection        'Bruker APEX2' 
_computing_data_reduction         'Bruker SAINT' 
_computing_structure_solution     'SHELXS-97 (Sheldrick, 2008)' 
_computing_structure_refinement   'SHELXL-97 (Sheldrick, 2008)' 
_refine_ls_structure_factor_coef  Fsqd  
_refine_ls_matrix_type            full 
_refine_ls_weighting_scheme       calc  
_refine_ls_weighting_details 
 'calc w=1/[\s^2^(Fo^2^)+(0.0000P)^2^+15.9623P] where P=(Fo^2^+2Fc^2^)/3' 
_atom_sites_solution_primary      direct 
_atom_sites_solution_hydrogens    geom 
_refine_ls_hydrogen_treatment     constr 
_refine_ls_extinction_method      none 
_refine_ls_extinction_coef        ? 
_refine_ls_number_reflns          10441 
_refine_ls_number_parameters      504 
_refine_ls_number_restraints      0 
_refine_ls_R_factor_all           0.0966 
_refine_ls_R_factor_gt            0.0667 
_refine_ls_wR_factor_ref          0.1479 
_refine_ls_wR_factor_gt           0.1305 
_refine_ls_goodness_of_fit_ref    1.098 
_refine_ls_restrained_S_all       1.098 
_refine_ls_shift/su_max           0.000 
_refine_ls_shift/su_mean          0.000 
 
loop_ 
 _atom_site_label 
 _atom_site_type_symbol 
 _atom_site_fract_x 
 _atom_site_fract_y 
 _atom_site_fract_z 
 _atom_site_U_iso_or_equiv 
 _atom_site_adp_type 
 _atom_site_occupancy 
 _atom_site_symetry_multiplicity 
 _atom_site_calc_flag 
 _atom_site_refinement_flags 
 _atom_site_disorder_assembly 
 _atom_site_disorder_group 
V1 V 0.30952(4) 0.34406(3) 0.25607(3) 0.01921(12) Uani 1 1 d . . . 
P1 P 0.25444(7) 0.46871(6) 0.21522(6) 0.0255(2) Uani 0.85 1 d P . . 
P2 P 0.39972(8) 0.46508(6) 0.26463(5) 0.0263(2) Uani 0.85 1 d P . . 
P3 P 0.38367(8) 0.42140(6) 0.16436(5) 0.0272(2) Uani 0.85 1 d P . . 
Cl1 Cl 0.3417(5) 0.4575(4) 0.2029(3) 0.0396(14) Uani 0.15 1 d P . . 
O1 O 0.29343(16) 0.33104(13) 0.34596(11) 0.0235(5) Uani 1 1 d . . . 
N1 N 0.39997(18) 0.26014(15) 0.22002(13) 0.0203(5) Uani 1 1 d . . . 
N2 N 0.18497(18) 0.30113(15) 0.21406(13) 0.0207(5) Uani 1 1 d . . . 
C1 C 0.3629(2) 0.18968(18) 0.22229(15) 0.0205(6) Uani 1 1 d . . . 
C2 C 0.2579(2) 0.17430(19) 0.22751(16) 0.0240(7) Uani 1 1 d . . . 
H2 H 0.2413 0.1238 0.2383 0.032 Uiso 1 1 calc R . . 
C3 C 0.1752(2) 0.22416(19) 0.21879(16) 0.0223(6) Uani 1 1 d . . . 
C4 C 0.5048(2) 0.27174(19) 0.19969(16) 0.0223(6) Uani 1 1 d . . . 
C5 C 0.5778(2) 0.29263(19) 0.24886(17) 0.0247(7) Uani 1 1 d . . . 
C6 C 0.6770(2) 0.3080(2) 0.22697(18) 0.0285(7) Uani 1 1 d . . . 
H6 H 0.7260 0.3223 0.2582 0.038 Uiso 1 1 calc R . . 
C7 C 0.7031(2) 0.3025(2) 0.16026(18) 0.0291(7) Uani 1 1 d . . . 
H7 H 0.7690 0.3136 0.1470 0.039 Uiso 1 1 calc R . . 
C8 C 0.6321(2) 0.2805(2) 0.11307(18) 0.0283(7) Uani 1 1 d . . . 
H8 H 0.6512 0.2761 0.0684 0.038 Uiso 1 1 calc R . . 
C9 C 0.5317(2) 0.2648(2) 0.13120(16) 0.0255(7) Uani 1 1 d . . . 
C10 C 0.5554(2) 0.2919(2) 0.32341(17) 0.0306(8) Uani 1 1 d . . . 
H10 H 0.4816 0.2928 0.3289 0.041 Uiso 1 1 calc R . . 
C11 C 0.5990(3) 0.3610(3) 0.3610(2) 0.0452(10) Uani 1 1 d . . . 
H11a H 0.6715 0.3570 0.3627 0.068 Uiso 1 1 calc R . . 
H11b H 0.5726 0.3620 0.4059 0.068 Uiso 1 1 calc R . . 
H11c H 0.5802 0.4076 0.3382 0.068 Uiso 1 1 calc R . . 
C12 C 0.5951(4) 0.2181(3) 0.3553(2) 0.0532(12) Uani 1 1 d . . . 
H12a H 0.5661 0.1745 0.3328 0.080 Uiso 1 1 calc R . . 
H12b H 0.5766 0.2170 0.4019 0.080 Uiso 1 1 calc R . . 
H12c H 0.6676 0.2165 0.3514 0.080 Uiso 1 1 calc R . . 
C13 C 0.4582(3) 0.2391(2) 0.07652(17) 0.0321(8) Uani 1 1 d . . . 
H13 H 0.3918 0.2303 0.0970 0.043 Uiso 1 1 calc R . . 
C14 C 0.4463(3) 0.2994(3) 0.02169(19) 0.0446(10) Uani 1 1 d . . . 
H14a H 0.4279 0.3478 0.0415 0.067 Uiso 1 1 calc R . . 
H14b H 0.3942 0.2835 -0.0091 0.067 Uiso 1 1 calc R . . 
H14c H 0.5092 0.3049 -0.0019 0.067 Uiso 1 1 calc R . . 
C15 C 0.4945(3) 0.1629(3) 0.0444(2) 0.0475(11) Uani 1 1 d . . . 
H15a H 0.5590 0.1708 0.0234 0.071 Uiso 1 1 calc R . . 
H15b H 0.4461 0.1463 0.0114 0.071 Uiso 1 1 calc R . . 
H15c H 0.5009 0.1242 0.0785 0.071 Uiso 1 1 calc R . . 
C16 C 0.4306(3) 0.1195(2) 0.2191(2) 0.0316(8) Uani 1 1 d . . . 
H16a H 0.4997 0.1355 0.2134 0.047 Uiso 1 1 calc R . . 
H16b H 0.4106 0.0878 0.1819 0.047 Uiso 1 1 calc R . . 
H16c H 0.4244 0.0907 0.2600 0.047 Uiso 1 1 calc R . . 
C17 C 0.0717(2) 0.1873(2) 0.21590(18) 0.0279(7) Uani 1 1 d . . . 
H17a H 0.0355 0.1985 0.2565 0.042 Uiso 1 1 calc R . . 
H17b H 0.0790 0.1326 0.2112 0.042 Uiso 1 1 calc R . . 
H17c H 0.0348 0.2073 0.1782 0.042 Uiso 1 1 calc R . . 
C18 C 0.0985(2) 0.34505(18) 0.19040(15) 0.0200(6) Uani 1 1 d . . . 
C19 C 0.0227(2) 0.36903(18) 0.23589(16) 0.0229(7) Uani 1 1 d . . . 
C20 C -0.0566(2) 0.41463(19) 0.21121(17) 0.0262(7) Uani 1 1 d . . . 
H20 H -0.1067 0.4318 0.2404 0.035 Uiso 1 1 calc R . . 
C21 C -0.0614(2) 0.4345(2) 0.14419(18) 0.0291(7) Uani 1 1 d . . . 
H21 H -0.1148 0.4647 0.1286 0.039 Uiso 1 1 calc R . . 
C22 C 0.0129(2) 0.4097(2) 0.09990(17) 0.0274(7) Uani 1 1 d . . . 
H22 H 0.0086 0.4236 0.0549 0.036 Uiso 1 1 calc R . . 
C23 C 0.0937(2) 0.36462(18) 0.12147(16) 0.0222(6) Uani 1 1 d . . . 
C24 C 0.0261(2) 0.3488(2) 0.31057(16) 0.0243(7) Uani 1 1 d . . . 
H24 H 0.0813 0.3118 0.3175 0.032 Uiso 1 1 calc R . . 
C25 C 0.0480(3) 0.4190(2) 0.35344(19) 0.0356(8) Uani 1 1 d . . . 
H25A H 0.1096 0.4429 0.3385 0.053 Uiso 1 1 calc R . . 
H25B H 0.0553 0.4036 0.3995 0.053 Uiso 1 1 calc R . . 
H25C H -0.0070 0.4549 0.3495 0.053 Uiso 1 1 calc R . . 
C26 C -0.0731(2) 0.3108(2) 0.33468(18) 0.0306(8) Uani 1 1 d . . . 
H26A H -0.0635 0.2905 0.3790 0.046 Uiso 1 1 calc R . . 
H26B H -0.0913 0.2698 0.3047 0.046 Uiso 1 1 calc R . . 
H26C H -0.1263 0.3486 0.3354 0.046 Uiso 1 1 calc R . . 
C27 C 0.1747(2) 0.3365(2) 0.07226(16) 0.0245(7) Uani 1 1 d . . . 
H27 H 0.2391 0.3338 0.0968 0.033 Uiso 1 1 calc R . . 
C28 C 0.1899(3) 0.3917(2) 0.01321(19) 0.0345(8) Uani 1 1 d . . . 
H28a H 0.1300 0.3921 -0.0142 0.052 Uiso 1 1 calc R . . 
H28b H 0.2466 0.3750 -0.0131 0.052 Uiso 1 1 calc R . . 
H28c H 0.2025 0.4427 0.0299 0.052 Uiso 1 1 calc R . . 
C29 C 0.1500(3) 0.2549(2) 0.04712(18) 0.0325(8) Uani 1 1 d . . . 
H29a H 0.1518 0.2196 0.0842 0.049 Uiso 1 1 calc R . . 
H29b H 0.1992 0.2397 0.0143 0.049 Uiso 1 1 calc R . . 
H29c H 0.0836 0.2545 0.0272 0.049 Uiso 1 1 calc R . . 
C30 C 0.3168(2) 0.32761(19) 0.41305(16) 0.0227(7) Uani 1 1 d . . . 
C31 C 0.3302(2) 0.2539(2) 0.44209(16) 0.0236(7) Uani 1 1 d . . . 
C32 C 0.3566(2) 0.2494(2) 0.50975(17) 0.0279(7) Uani 1 1 d . . . 
H32 H 0.3661 0.2014 0.5295 0.037 Uiso 1 1 calc R . . 
C33 C 0.3690(3) 0.3156(2) 0.54834(18) 0.0304(8) Uani 1 1 d . . . 
H33 H 0.3883 0.3118 0.5931 0.040 Uiso 1 1 calc R . . 
C34 C 0.3526(2) 0.3864(2) 0.51998(17) 0.0301(8) Uani 1 1 d . . . 
H34 H 0.3594 0.4302 0.5465 0.040 Uiso 1 1 calc R . . 
C35 C 0.3257(2) 0.3949(2) 0.45215(17) 0.0252(7) Uani 1 1 d . . . 
C36 C 0.3103(2) 0.18133(19) 0.40130(17) 0.0250(7) Uani 1 1 d . . . 
H36 H 0.3327 0.1910 0.3552 0.033 Uiso 1 1 calc R . . 
C37 C 0.3658(3) 0.1095(2) 0.4268(2) 0.0363(8) Uani 1 1 d . . . 
H37a H 0.4369 0.1203 0.4308 0.054 Uiso 1 1 calc R . . 
H37b H 0.3559 0.0680 0.3956 0.054 Uiso 1 1 calc R . . 
H37c H 0.3393 0.0951 0.4698 0.054 Uiso 1 1 calc R . . 
C38 C 0.1959(2) 0.1646(2) 0.39933(18) 0.0307(8) Uani 1 1 d . . . 
H38a H 0.1725 0.1529 0.4438 0.046 Uiso 1 1 calc R . . 
H38b H 0.1831 0.1215 0.3704 0.046 Uiso 1 1 calc R . . 
H38c H 0.1605 0.2090 0.3826 0.046 Uiso 1 1 calc R . . 
C39 C 0.3066(3) 0.4756(2) 0.42511(18) 0.0309(8) Uani 1 1 d . . . 
H39 H 0.2858 0.4712 0.3780 0.041 Uiso 1 1 calc R . . 
C40 C 0.4030(3) 0.5250(2) 0.4282(2) 0.0382(9) Uani 1 1 d . . . 
H40a H 0.4237 0.5310 0.4742 0.057 Uiso 1 1 calc R . . 
H40b H 0.3896 0.5746 0.4090 0.057 Uiso 1 1 calc R . . 
H40c H 0.4561 0.5001 0.4035 0.057 Uiso 1 1 calc R . . 
C41 C 0.2215(3) 0.5172(3) 0.4638(2) 0.0461(11) Uani 1 1 d . . . 
H41a H 0.1604 0.4873 0.4614 0.069 Uiso 1 1 calc R . . 
H41b H 0.2098 0.5669 0.4441 0.069 Uiso 1 1 calc R . . 
H41c H 0.2413 0.5234 0.5098 0.069 Uiso 1 1 calc R . . 
C42 C 0.7720(3) 0.5693(3) 0.3138(3) 0.0569(13) Uani 1 1 d . . . 
H42a H 0.7583 0.5185 0.3303 0.085 Uiso 1 1 calc R . . 
H42b H 0.7730 0.6050 0.3506 0.085 Uiso 1 1 calc R . . 
H42c H 0.8365 0.5698 0.2917 0.085 Uiso 1 1 calc R . . 
C43 C 0.6892(3) 0.5927(2) 0.2639(3) 0.0501(12) Uani 1 1 d . . . 
H43a H 0.6239 0.5903 0.2862 0.067 Uiso 1 1 calc R . . 
H43b H 0.7003 0.6457 0.2504 0.067 Uiso 1 1 calc R . . 
C44 C 0.6858(3) 0.5425(2) 0.2018(2) 0.0495(11) Uani 1 1 d . . . 
H44a H 0.7529 0.5418 0.1820 0.066 Uiso 1 1 calc R . . 
H44b H 0.6701 0.4902 0.2156 0.066 Uiso 1 1 calc R . . 
C45 C 0.6110(4) 0.5660(3) 0.1487(3) 0.0554(12) Uani 1 1 d . . . 
H45a H 0.6284 0.6172 0.1329 0.074 Uiso 1 1 calc R . . 
H45b H 0.5440 0.5686 0.1684 0.074 Uiso 1 1 calc R . . 
C46 C 0.6081(4) 0.5112(3) 0.0890(3) 0.0666(15) Uani 1 1 d . . . 
H46a H 0.6729 0.5111 0.0672 0.100 Uiso 1 1 calc R . . 
H46b H 0.5568 0.5277 0.0579 0.100 Uiso 1 1 calc R . . 
H46c H 0.5927 0.4601 0.1044 0.100 Uiso 1 1 calc R . . 
 
loop_ 
 _atom_site_aniso_label 
 _atom_site_aniso_U_11 
 _atom_site_aniso_U_22 
 _atom_site_aniso_U_33 
 _atom_site_aniso_U_23 
 _atom_site_aniso_U_13 
 _atom_site_aniso_U_12 
V1 0.0141(2) 0.0210(3) 0.0225(3) -0.0005(2) -0.00022(19) 0.0000(2) 
P1 0.0199(5) 0.0191(5) 0.0376(6) 0.0029(4) -0.0013(4) 0.0002(4) 
P2 0.0242(5) 0.0224(5) 0.0323(6) 0.0009(4) -0.0042(4) -0.0063(4) 
P3 0.0280(5) 0.0248(5) 0.0289(5) 0.0017(4) 0.0059(4) -0.0037(4) 
Cl1 0.032(3) 0.044(4) 0.042(4) 0.011(3) 0.007(3) -0.001(3) 
O1 0.0193(10) 0.0298(12) 0.0213(11) -0.0039(9) -0.0016(8) -0.0001(9) 
N1 0.0153(12) 0.0246(14) 0.0210(13) -0.0011(11) 0.0009(10) 0.0001(10) 
N2 0.0155(12) 0.0235(13) 0.0230(13) -0.0008(11) 0.0003(10) 0.0000(10) 
C1 0.0196(15) 0.0220(15) 0.0201(15) -0.0040(12) 0.0037(11) -0.0001(12) 
C2 0.0218(15) 0.0215(16) 0.0287(17) 0.0000(13) -0.0002(13) -0.0009(12) 
C3 0.0180(15) 0.0283(17) 0.0207(15) -0.0008(13) 0.0008(11) -0.0007(12) 
C4 0.0155(14) 0.0270(16) 0.0244(16) -0.0014(13) 0.0016(12) 0.0014(12) 
C5 0.0200(15) 0.0272(17) 0.0269(17) 0.0015(13) 0.0019(12) 0.0011(13) 
C6 0.0186(16) 0.0331(19) 0.0338(19) -0.0023(15) -0.0017(13) -0.0018(13) 
C7 0.0152(15) 0.0360(19) 0.0362(19) -0.0019(15) 0.0026(13) -0.0016(13) 
C8 0.0223(16) 0.0349(19) 0.0277(18) 0.0004(14) 0.0067(13) -0.0011(14) 
C9 0.0193(15) 0.0325(18) 0.0246(17) -0.0025(14) 0.0047(12) -0.0001(13) 
C10 0.0167(15) 0.047(2) 0.0278(18) -0.0033(16) 0.0011(13) -0.0006(14) 
C11 0.045(2) 0.058(3) 0.033(2) -0.0092(19) -0.0006(17) 0.003(2) 
C12 0.071(3) 0.054(3) 0.035(2) 0.007(2) -0.003(2) -0.005(2) 
C13 0.0212(16) 0.049(2) 0.0260(18) -0.0050(16) 0.0044(13) -0.0048(15) 
C14 0.029(2) 0.077(3) 0.028(2) 0.003(2) -0.0001(15) -0.004(2) 
C15 0.040(2) 0.060(3) 0.043(2) -0.021(2) 0.0056(18) -0.010(2) 
C16 0.0231(17) 0.0266(18) 0.045(2) -0.0039(16) 0.0060(15) 0.0021(14) 
C17 0.0191(15) 0.0263(17) 0.038(2) -0.0016(14) 0.0007(13) -0.0020(13) 
C18 0.0144(13) 0.0214(15) 0.0242(15) -0.0014(12) -0.0035(11) -0.0019(12) 
C19 0.0167(14) 0.0246(16) 0.0276(17) -0.0015(13) -0.0003(12) -0.0049(12) 
C20 0.0166(15) 0.0288(17) 0.0333(18) -0.0022(14) 0.0013(13) 0.0027(13) 
C21 0.0189(16) 0.0315(18) 0.037(2) 0.0017(15) -0.0027(14) 0.0052(13) 
C22 0.0228(16) 0.0335(19) 0.0260(17) 0.0040(14) -0.0019(13) 0.0003(14) 
C23 0.0196(15) 0.0239(16) 0.0230(16) -0.0022(12) 0.0010(12) -0.0019(12) 
C24 0.0179(14) 0.0302(17) 0.0247(16) -0.0013(14) 0.0022(12) 0.0002(13) 
C25 0.0340(19) 0.041(2) 0.032(2) -0.0025(16) 0.0031(15) -0.0062(16) 
C26 0.0239(17) 0.0362(19) 0.0318(19) -0.0018(15) 0.0031(14) -0.0046(14) 
C27 0.0195(15) 0.0341(18) 0.0200(15) -0.0005(13) 0.0008(12) -0.0004(13) 
C28 0.0324(19) 0.037(2) 0.034(2) 0.0017(16) 0.0071(15) -0.0004(16) 
C29 0.0337(19) 0.037(2) 0.0268(18) -0.0042(15) 0.0040(14) 0.0026(16) 
C30 0.0132(14) 0.0334(18) 0.0215(16) -0.0026(13) 0.0007(11) -0.0004(12) 
C31 0.0162(14) 0.0318(18) 0.0228(16) -0.0028(13) 0.0033(12) -0.0023(13) 
C32 0.0238(17) 0.0320(18) 0.0278(18) 0.0006(14) 0.0030(13) -0.0008(14) 
C33 0.0290(18) 0.038(2) 0.0245(17) -0.0025(15) -0.0014(13) -0.0022(15) 
C34 0.0235(17) 0.038(2) 0.0283(18) -0.0095(15) -0.0004(13) -0.0031(14) 
C35 0.0161(15) 0.0308(17) 0.0287(17) -0.0056(14) 0.0010(12) 0.0001(13) 
C36 0.0220(16) 0.0285(17) 0.0245(17) -0.0010(13) 0.0035(12) -0.0019(13) 
C37 0.037(2) 0.033(2) 0.039(2) -0.0039(16) -0.0047(16) 0.0046(16) 
C38 0.0269(17) 0.0316(19) 0.0336(19) -0.0028(15) -0.0007(14) -0.0014(14) 
C39 0.0310(18) 0.0305(18) 0.0312(19) -0.0098(15) -0.0068(14) 0.0044(15) 
C40 0.049(2) 0.0258(19) 0.040(2) -0.0028(16) -0.0093(18) -0.0027(17) 
C41 0.038(2) 0.048(3) 0.052(3) -0.019(2) -0.0081(19) 0.0148(19) 
C42 0.041(2) 0.051(3) 0.078(4) -0.014(2) 0.012(2) 0.000(2) 
C43 0.033(2) 0.036(2) 0.082(3) -0.011(2) 0.013(2) 0.0021(17) 
C44 0.037(2) 0.037(2) 0.074(3) -0.005(2) 0.017(2) 0.0005(18) 
C45 0.049(3) 0.038(2) 0.079(4) 0.001(2) 0.012(2) -0.005(2) 
C46 0.077(4) 0.054(3) 0.070(4) 0.001(3) 0.012(3) -0.016(3) 
 
loop_ 
 _geom_bond_atom_site_label_1 
 _geom_bond_atom_site_label_2 
 _geom_bond_distance 
 _geom_bond_site_symmetry_2 
 _geom_bond_publ_flag 
V1 O1 1.819(2) . ? 
V1 N2 1.987(3) . ? 
V1 N1 2.017(3) . ? 
V1 Cl1 2.278(6) . ? 
V1 P2 2.4210(11) . ? 
V1 P1 2.4236(11) . ? 
V1 P3 2.4719(12) . ? 
P1 Cl1 1.194(6) . ? 
P1 P3 2.1489(15) . ? 
P1 P2 2.1533(14) . ? 
P2 Cl1 1.454(7) . ? 
P2 P3 2.1474(15) . ? 
P3 Cl1 1.136(7) . ? 
O1 C30 1.372(4) . ? 
N1 C1 1.319(4) . ? 
N1 C4 1.456(4) . ? 
N2 C3 1.346(4) . ? 
N2 C18 1.450(4) . ? 
C1 C2 1.414(4) . ? 
C1 C16 1.513(4) . ? 
C2 C3 1.404(4) . ? 
C3 C17 1.509(4) . ? 
C4 C9 1.416(4) . ? 
C4 C5 1.420(4) . ? 
C5 C6 1.405(4) . ? 
C5 C10 1.516(5) . ? 
C6 C7 1.378(5) . ? 
C7 C8 1.379(5) . ? 
C8 C9 1.401(4) . ? 
C9 C13 1.523(5) . ? 
C10 C12 1.523(6) . ? 
C10 C11 1.527(5) . ? 
C13 C14 1.521(5) . ? 
C13 C15 1.547(5) . ? 
C18 C19 1.414(4) . ? 
C18 C23 1.416(4) . ? 
C19 C20 1.400(4) . ? 
C19 C24 1.530(4) . ? 
C20 C21 1.381(5) . ? 
C21 C22 1.389(5) . ? 
C22 C23 1.390(4) . ? 
C23 C27 1.532(4) . ? 
C24 C25 1.516(5) . ? 
C24 C26 1.544(4) . ? 
C27 C28 1.531(5) . ? 
C27 C29 1.538(5) . ? 
C30 C35 1.410(5) . ? 
C30 C31 1.417(5) . ? 
C31 C32 1.394(5) . ? 
C31 C36 1.522(5) . ? 
C32 C33 1.393(5) . ? 
C33 C34 1.370(5) . ? 
C34 C35 1.404(5) . ? 
C35 C39 1.522(5) . ? 
C36 C37 1.532(5) . ? 
C36 C38 1.538(4) . ? 
C39 C40 1.535(5) . ? 
C39 C41 1.543(5) . ? 
C42 C43 1.529(7) . ? 
C43 C44 1.515(6) . ? 
C44 C45 1.502(7) . ? 
C45 C46 1.524(7) . ? 
 
loop_ 
 _geom_angle_atom_site_label_1 
 _geom_angle_atom_site_label_2 
 _geom_angle_atom_site_label_3 
 _geom_angle 
 _geom_angle_site_symmetry_1 
 _geom_angle_site_symmetry_3 
 _geom_angle_publ_flag 
O1 V1 N2 105.66(10) . . ? 
O1 V1 N1 109.37(10) . . ? 
N2 V1 N1 93.90(10) . . ? 
O1 V1 Cl1 126.05(19) . . ? 
N2 V1 Cl1 106.45(18) . . ? 
N1 V1 Cl1 110.37(18) . . ? 
O1 V1 P2 95.57(8) . . ? 
N2 V1 P2 139.55(8) . . ? 
N1 V1 P2 111.18(8) . . ? 
Cl1 V1 P2 35.88(17) . . ? 
O1 V1 P1 113.97(8) . . ? 
N2 V1 P1 86.95(8) . . ? 
N1 V1 P1 134.66(8) . . ? 
Cl1 V1 P1 29.20(16) . . ? 
P2 V1 P1 52.78(4) . . ? 
O1 V1 P3 147.49(8) . . ? 
N2 V1 P3 102.75(8) . . ? 
N1 V1 P3 83.89(8) . . ? 
Cl1 V1 P3 27.29(17) . . ? 
P2 V1 P3 52.05(4) . . ? 
P1 V1 P3 52.06(4) . . ? 
Cl1 P1 P3 22.1(3) . . ? 
Cl1 P1 P2 39.8(3) . . ? 
P3 P1 P2 59.89(5) . . ? 
Cl1 P1 V1 68.6(3) . . ? 
P3 P1 V1 65.13(4) . . ? 
P2 P1 V1 63.55(4) . . ? 
Cl1 P2 P3 29.5(3) . . ? 
Cl1 P2 P1 31.7(3) . . ? 
P3 P2 P1 59.96(5) . . ? 
Cl1 P2 V1 66.7(3) . . ? 
P3 P2 V1 65.19(4) . . ? 
P1 P2 V1 63.67(4) . . ? 
Cl1 P3 P2 39.1(3) . . ? 
Cl1 P3 P1 23.3(3) . . ? 
P2 P3 P1 60.16(5) . . ? 
Cl1 P3 V1 66.8(3) . . ? 
P2 P3 V1 62.75(4) . . ? 
P1 P3 V1 62.81(4) . . ? 
P3 Cl1 P1 134.5(6) . . ? 
P3 Cl1 P2 111.4(5) . . ? 
P1 Cl1 P2 108.4(5) . . ? 
P3 Cl1 V1 85.9(4) . . ? 
P1 Cl1 V1 82.2(3) . . ? 
P2 Cl1 V1 77.4(3) . . ? 
C30 O1 V1 159.80(19) . . ? 
C1 N1 C4 119.4(3) . . ? 
C1 N1 V1 116.0(2) . . ? 
C4 N1 V1 124.2(2) . . ? 
C3 N2 C18 118.0(2) . . ? 
C3 N2 V1 115.0(2) . . ? 
C18 N2 V1 126.1(2) . . ? 
N1 C1 C2 122.8(3) . . ? 
N1 C1 C16 121.8(3) . . ? 
C2 C1 C16 115.4(3) . . ? 
C3 C2 C1 129.5(3) . . ? 
N2 C3 C2 123.1(3) . . ? 
N2 C3 C17 120.4(3) . . ? 
C2 C3 C17 116.5(3) . . ? 
C9 C4 C5 121.1(3) . . ? 
C9 C4 N1 119.8(3) . . ? 
C5 C4 N1 119.1(3) . . ? 
C6 C5 C4 117.7(3) . . ? 
C6 C5 C10 119.4(3) . . ? 
C4 C5 C10 122.7(3) . . ? 
C7 C6 C5 121.4(3) . . ? 
C6 C7 C8 120.4(3) . . ? 
C7 C8 C9 121.3(3) . . ? 
C8 C9 C4 118.1(3) . . ? 
C8 C9 C13 118.2(3) . . ? 
C4 C9 C13 123.7(3) . . ? 
C5 C10 C12 110.4(3) . . ? 
C5 C10 C11 113.6(3) . . ? 
C12 C10 C11 109.1(3) . . ? 
C14 C13 C9 112.2(3) . . ? 
C14 C13 C15 108.9(3) . . ? 
C9 C13 C15 110.4(3) . . ? 
C19 C18 C23 121.4(3) . . ? 
C19 C18 N2 120.2(3) . . ? 
C23 C18 N2 118.3(3) . . ? 
C20 C19 C18 118.0(3) . . ? 
C20 C19 C24 119.5(3) . . ? 
C18 C19 C24 122.5(3) . . ? 
C21 C20 C19 120.9(3) . . ? 
C20 C21 C22 120.4(3) . . ? 
C21 C22 C23 121.3(3) . . ? 
C22 C23 C18 117.9(3) . . ? 
C22 C23 C27 121.1(3) . . ? 
C18 C23 C27 121.0(3) . . ? 
C25 C24 C19 111.6(3) . . ? 
C25 C24 C26 109.2(3) . . ? 
C19 C24 C26 112.2(3) . . ? 
C28 C27 C23 112.7(3) . . ? 
C28 C27 C29 110.8(3) . . ? 
C23 C27 C29 110.8(3) . . ? 
O1 C30 C35 121.4(3) . . ? 
O1 C30 C31 117.7(3) . . ? 
C35 C30 C31 120.9(3) . . ? 
C32 C31 C30 118.5(3) . . ? 
C32 C31 C36 120.9(3) . . ? 
C30 C31 C36 120.6(3) . . ? 
C33 C32 C31 121.1(3) . . ? 
C34 C33 C32 119.7(3) . . ? 
C33 C34 C35 122.1(3) . . ? 
C34 C35 C30 117.7(3) . . ? 
C34 C35 C39 118.6(3) . . ? 
C30 C35 C39 123.7(3) . . ? 
C31 C36 C37 114.6(3) . . ? 
C31 C36 C38 109.7(3) . . ? 
C37 C36 C38 108.8(3) . . ? 
C35 C39 C40 111.3(3) . . ? 
C35 C39 C41 112.0(3) . . ? 
C40 C39 C41 108.8(3) . . ? 
C44 C43 C42 113.4(4) . . ? 
C45 C44 C43 115.9(4) . . ? 
C44 C45 C46 113.3(4) . . ? 
 
_diffrn_measured_fraction_theta_max    0.995 
_diffrn_reflns_theta_full              27.51 
_diffrn_measured_fraction_theta_full   0.995 
_refine_diff_density_max    0.657 
_refine_diff_density_min   -0.558 
_refine_diff_density_rms    0.081 
